# Supplementary material for: A coumarin-based fluorescent probe for NIR imaging-guided photodynamic therapy against S. aureus-induced infection in mouse models
Source: Royal Society of Chemistry journal article supplement (doi:10.1039/d1tb02723a), 2022-01-01
Supplement: d1tb02723a1.pdf [file d1tb02723a1.pdf]

## A coumarin based fluorescent probe for NIR imaging guided photodynamic therapy against *S. aureus*-induced infection in mice models

Jun Li,<sup>#, a, b</sup> Le Tu,<sup>#, c</sup> Qingying Ouyang,<sup>#, c</sup> Sheng-gang Yang,<sup>#, d</sup> Xiao Liu,<sup>a</sup> Qianqian Zhai,<sup>a</sup> Yao Sun,<sup>c</sup> Juyoung Yoon,<sup>\*, b</sup> Huailong Teng<sup>\*, a</sup>

- a. Department of Chemistry, College of Science, Huazhong Agricultural University, Wuhan 430070, P. R. China.
- b. Department of Chemistry and Nano Science, Ewha Womans University, Seoul 120-750, Korea.
- c. Key Laboratory of Pesticides and Chemical Biology, Ministry of Education, College of Chemistry, Central China Normal University, Wuhan 430079, P. R. China.
- d. College of Pharmacy, Guizhou Medical University, Guiyang, 550025, P. R. China.

# J. Li, L. Tu, Q. Ouyang and S. Yang contributed equally to this work.

### Table of Contents

| Content                                                                            | Page# |
|------------------------------------------------------------------------------------|-------|
| 1. Synthesis and characterization of probe <b>HZAU800</b> and <b>P1</b>            | S2-S5 |
| 2. pH dependence and photostability of <b>HZAU800</b>                              | S5    |
| 3. Verification of ROS produced by <b>HZAU800</b>                                  | S6    |
| 4. Cytotoxicity assay                                                              | S6    |
| 5. NIR imaging of <i>S. aureus</i> and <i>E. colic</i> using <b>HZAU800</b>        | S7    |
| 6. Evaluation of PDT effect of <b>HZAU800</b> on <i>S. aureus</i> infected tissues | S7    |
| 7. The H&E staining assessment of <b>HZAU800</b> in different tissues              | S8    |
| 8. The dihedral angle and molecular dynamics simulation of <b>HZAU800</b>          | S8    |
| 9. Reference                                                                       | S8    |

## 1. Synthesis and characterization of probe HZAU800 and P1

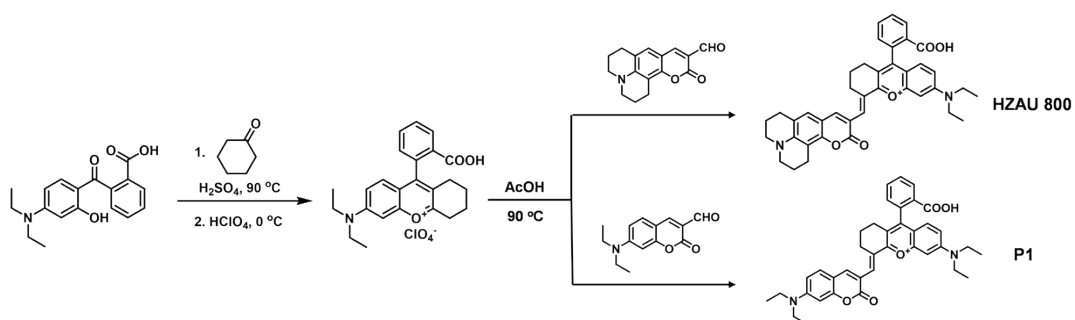

**General synthetic procedure.** Rhodamine analog **1**<sup>1</sup> (1.0 eq) and coumarin derivatives (1.0 eq)<sup>2,3</sup> were dissolved in AcOH (8 mL). The mixture was heated at 90 °C for 5 h. After completing the reaction, the solvent was removed under reduced pressure, the residue was subjected to column chromatography (CH<sub>2</sub>Cl<sub>2</sub>: MeOH=15:1) to obtain the final product as green solid.

**HZAU800:** yield: 16.5%. <sup>1</sup>H NMR (400 MHz, CD<sub>3</sub>CN) δ 8.26 (d, *J* = 8.0 Hz, 1H), 8.13 (s, 1H), 7.89 (s, 1H), 7.83 (t, *J* = 7.6 Hz, 1H), 7.74 (t, *J* = 7.6 Hz, 1H), 7.26 (d, *J* = 7.6 Hz, 1H), 7.07-6.98 (m, 4H), 3.65-3.59 (m, 4H), 3.35 (t, *J* = 5.2 Hz, 4H), 2.90 (t, *J* = 6.0 Hz, 2H), 2.78 (t, *J* = 6.4 Hz, 2H), 2.74 (t, *J* = 6.0 Hz, 2H), 2.33 (m, *t, J* = 5.6 Hz, 4H), 1.82-1.74 (m, 4H), 1.26 (s, 6H). <sup>13</sup>C NMR (150 MHz, DMSO-*d*<sub>6</sub>): 166.73, 161.14, 151.19, 147.59, 144.12, 133.40, 130.29, 129.52, 128.57, 127.64, 126.99, 121.95, 119.37, 113.18, 108.35, 105.35, 95.64, 65.00, 59.85, 54.99, 49.75, 49.20, 45.35, 27.20, 26.87, 25.37, 21.05, 20.74, 19.79, 19.66, 15.25, 14.17, 12.59. HRMS: calcd. for [M-ClO<sub>4</sub>]<sup>+</sup>: 627.28535; found: 627.28540.

**P1:** yield: 13%. <sup>1</sup>H NMR (600 MHz, CDCl<sub>3</sub>): 7.94 (d, *J* = 11.4 Hz, 1H), 7.64-7.62 (m, 1H), 7.58-7.52 (m, 2H), 7.38 (s, 1H), 7.28 (s, 1H), 7.19 (d, *J* = 11.4 Hz, 1H), 6.61-6.58 (dd, *J* = 3.0, 13.2 Hz, 1H), 6.53 (d, *J* = 3.0 Hz, 1H), 6.49-6.45 (m, 2H), 6.35-6.33 (dd, *J* = 3.6, 13.8 Hz, 1H), 3.43 (q, *J* = 10.8 Hz, 4H), 3.35 (q, *J* = 10.8 Hz, 4H), 2.71-2.69 (m, 1H), 2.15-2.09 (m, 1H), 1.72-1.58 (m, 4H), 1.22 (t, *J* = 10.2 Hz, 6H), 1.17 (t, *J* = 10.2 Hz, 6H). <sup>13</sup>C NMR (150 MHz, DMSO-*d*<sub>6</sub>): 169.08, 161.33, 155.51, 150.66, 141.56, 135.38, 130.67, 130.49, 130.00, 129.84, 129.47, 128.38, 126.55, 123.28, 115.71, 109.32, 108.12, 96.59, 96.48, 44.21, 43.80, 40.14, 27.09, 31.83, 12.44. HRMS: calcd for [M-ClO<sub>4</sub>+H]<sup>+</sup>: 604.2926; found: 604.2884.

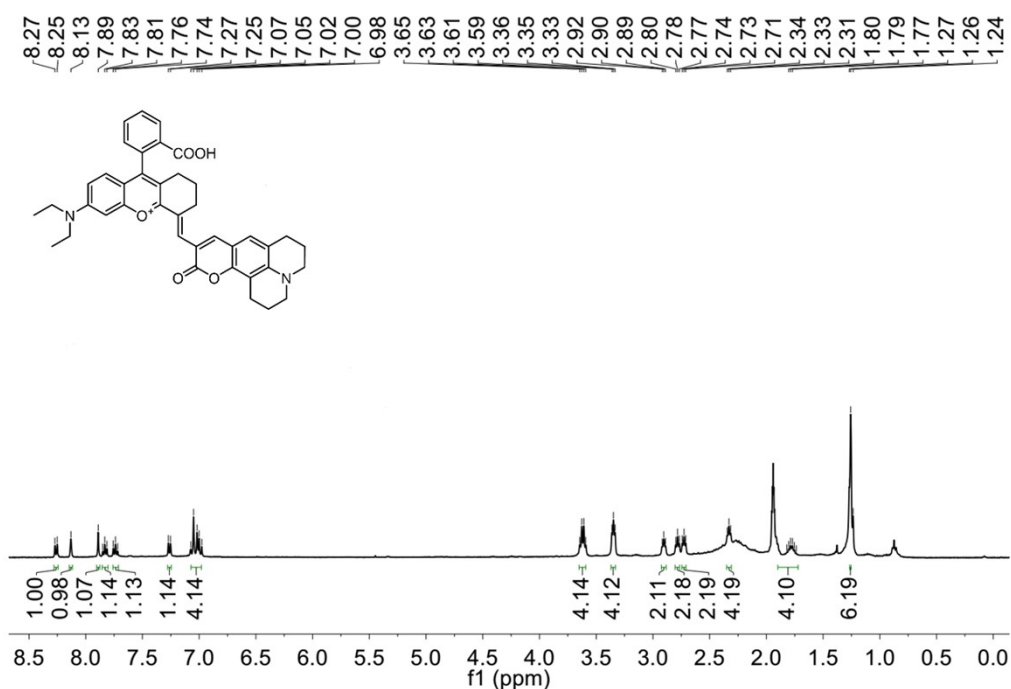

Figure S1. <sup>1</sup>H NMR of HZAU800

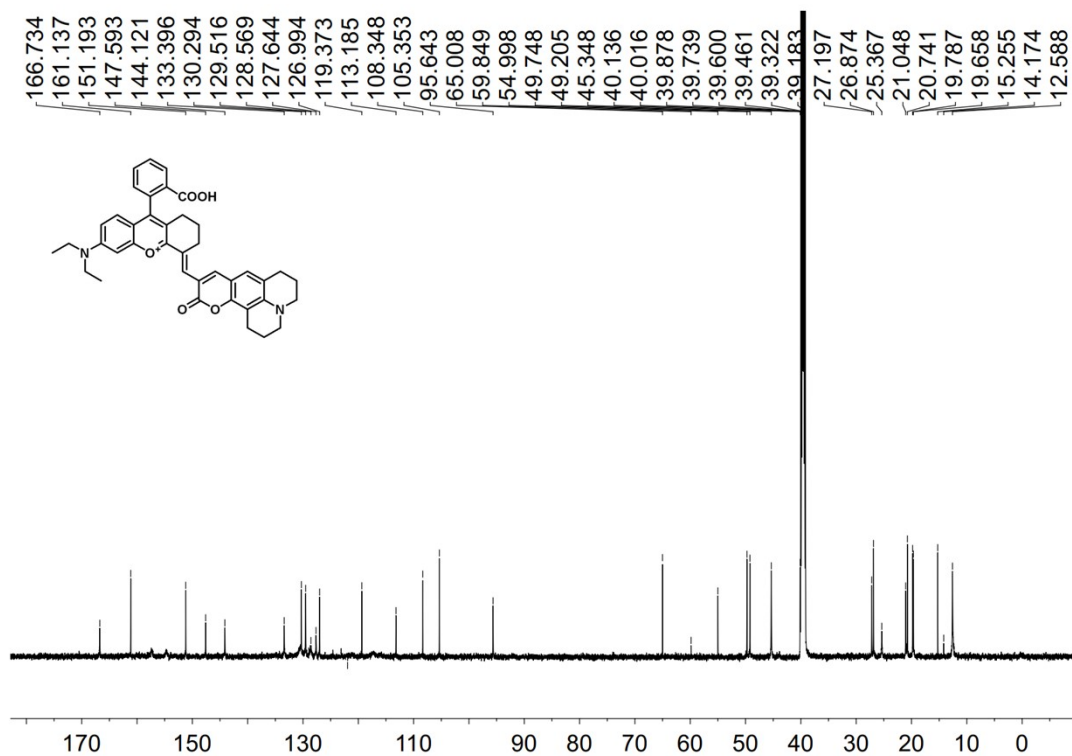

Figure S2. <sup>13</sup>C NMR of HZAU800

T: FIMS+p ESI Full lockms [80.0000-1200.0000]

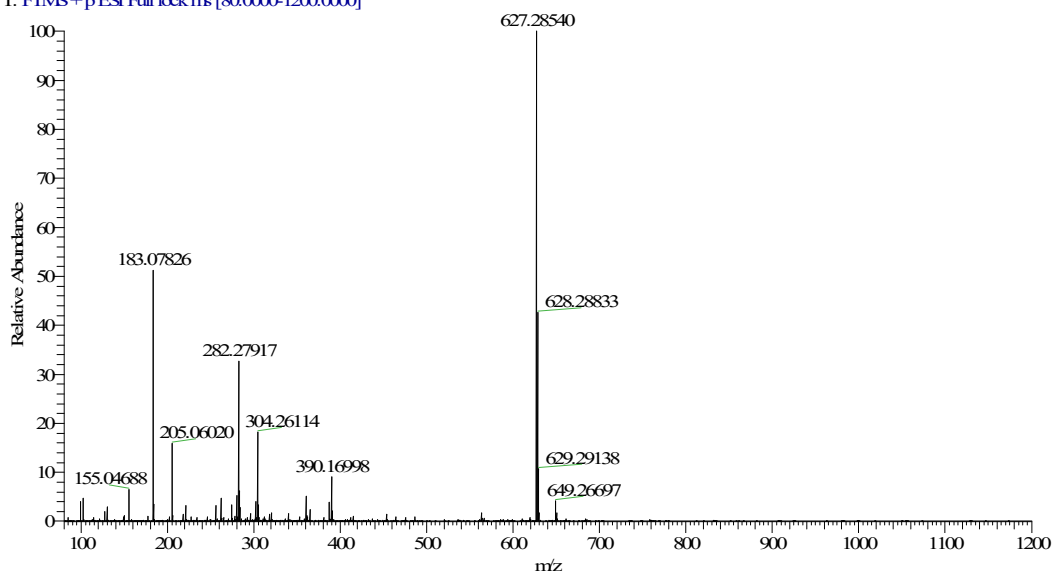

Figure S3. HRMS of HZAU800

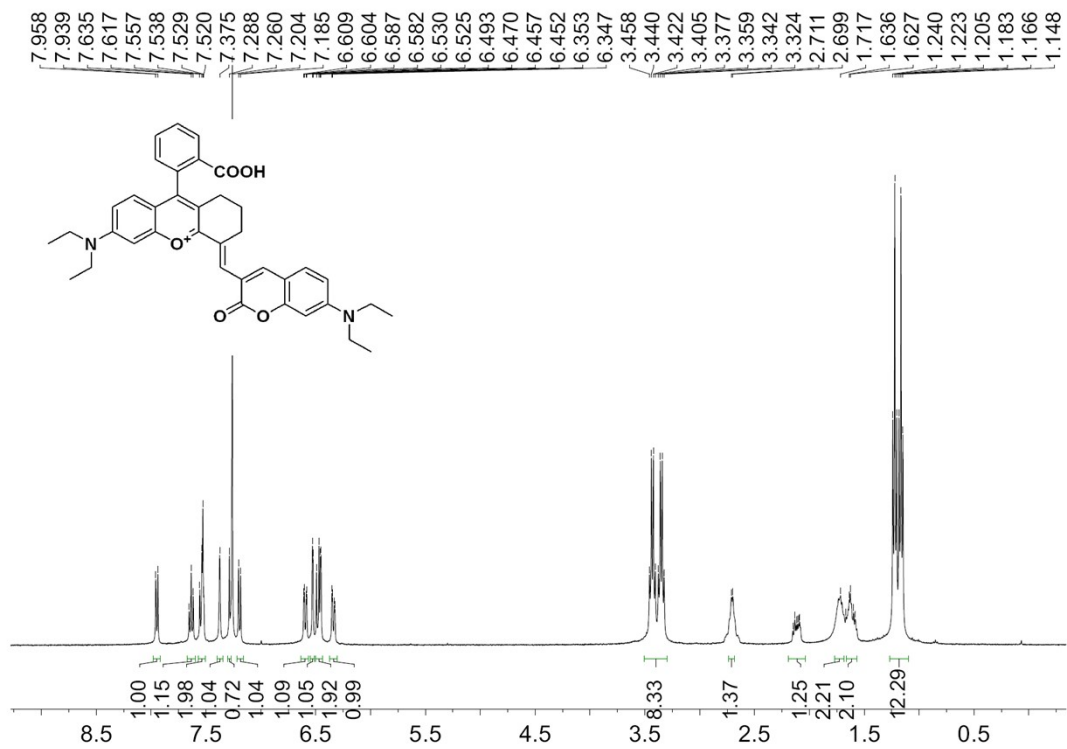

Figure S4. <sup>1</sup>H NMR of P1

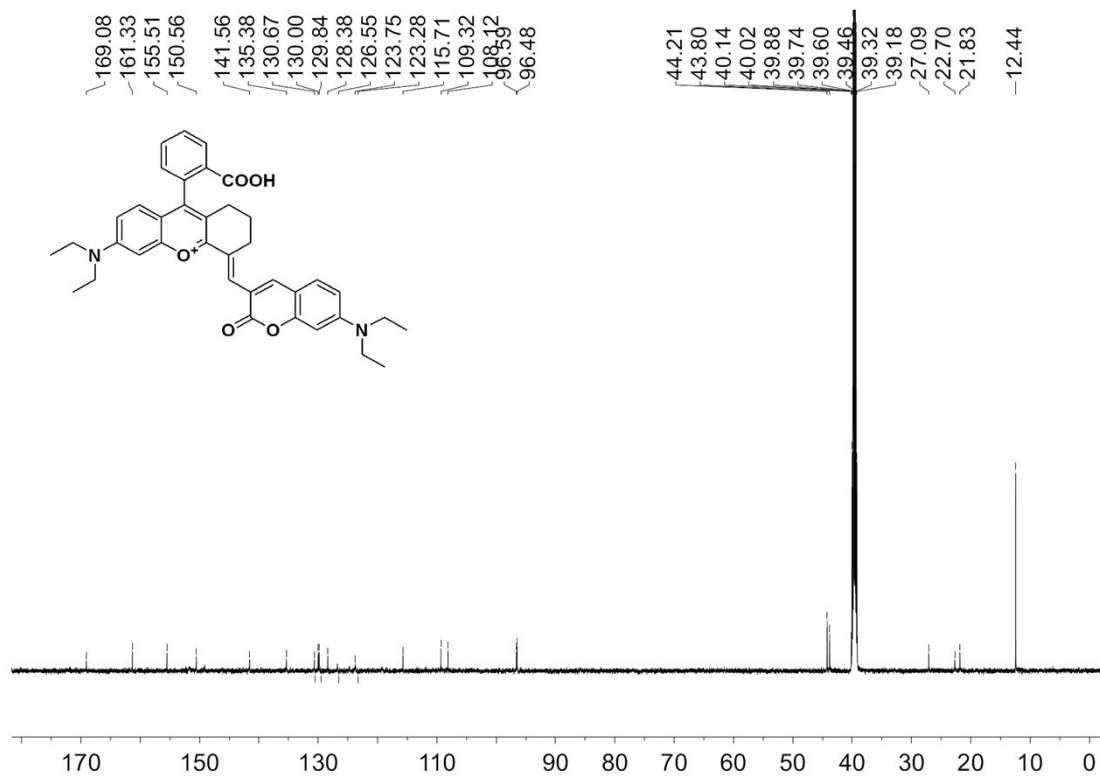

Figure S5. <sup>13</sup>C NMR of P1

OYQY-2 #13 RT: 0.09 AV: 1 NL: 2.36E8  
T: FTMS+p ESI Full lock.ms [80.0000-1200.0000]

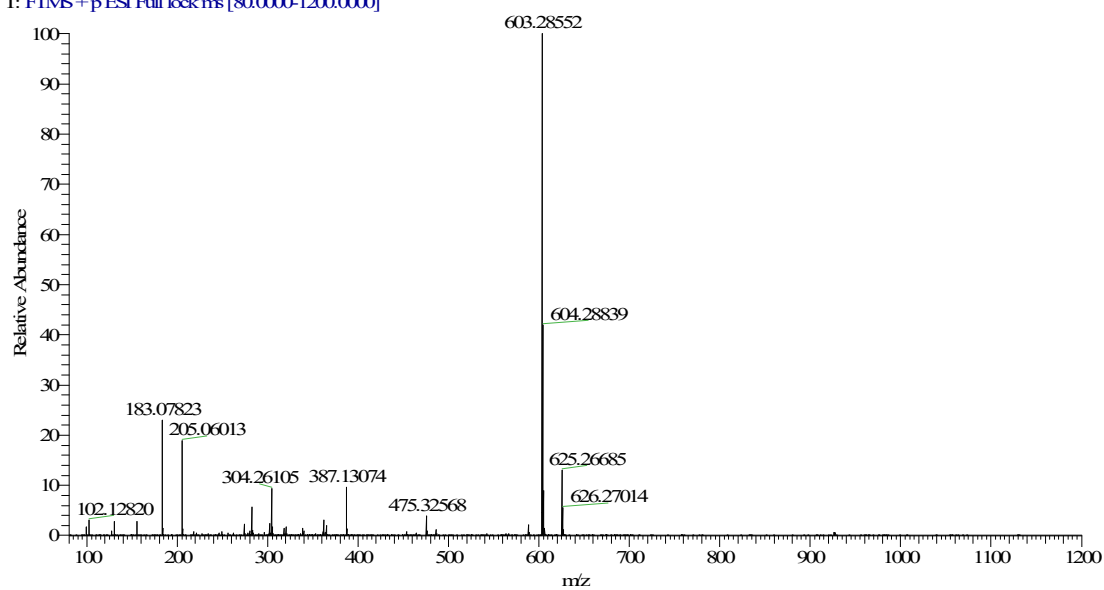

Figure S6. HRMS of P1

## 2. Optical properties of HZAU800

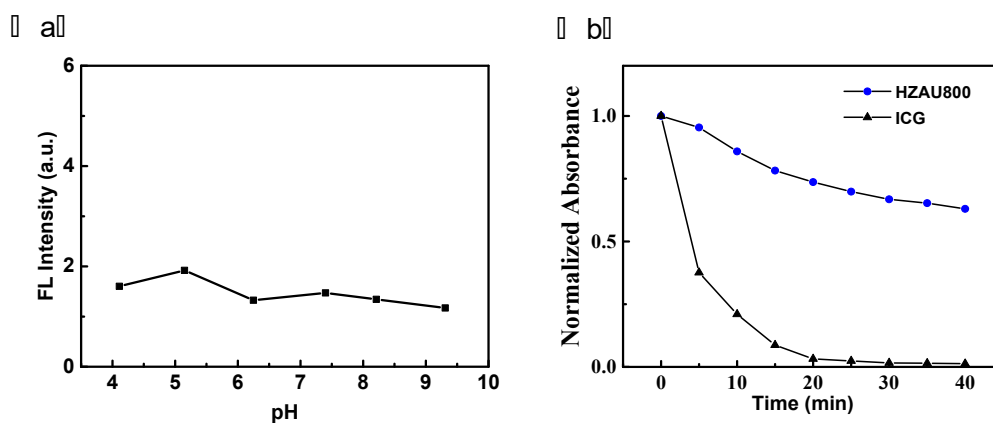

Figure S7. pH dependence (a) and photostability of HZAU800 (b)

## 3. Verification of ROS produced by HZAU800

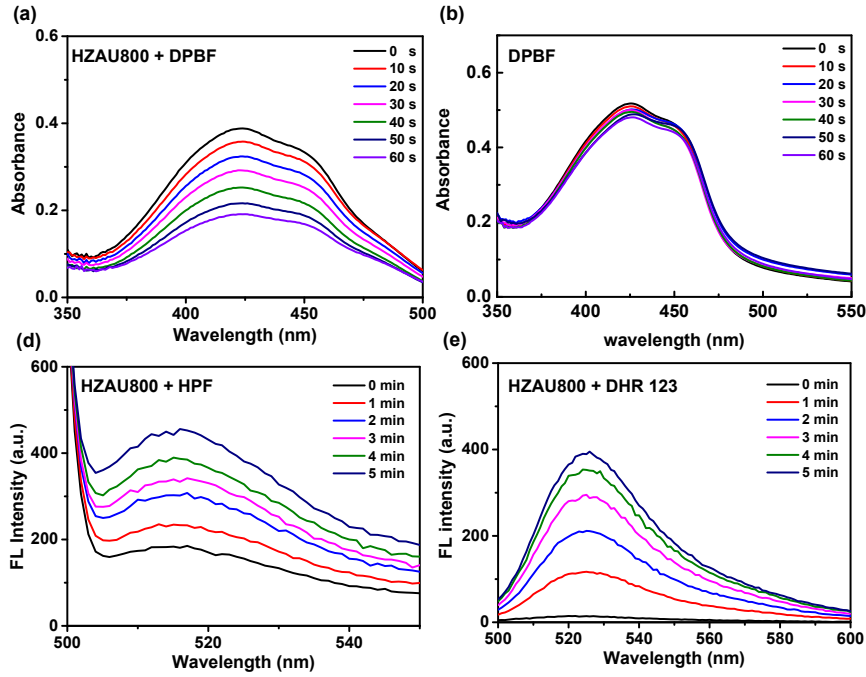

**Figure S8.** Verification of ROS produced by **HZAU800** using different ROS indicators: (a) UV spectrum of 10 μM **HZAU800** + 30 μM DPBF under laser's irradiation at different time; (b) UV spectrum of 30 μM DPBF under laser's irradiation at different time; (c) fluorescence response of 10 μM **HZAU800** + 10 μM HPF under laser's irradiation at different time; (d) fluorescence response of 10 μM **HZAU800** + 10 μM DHR 123 under laser's irradiation at different time.

#### 4. Cytotoxicity assay

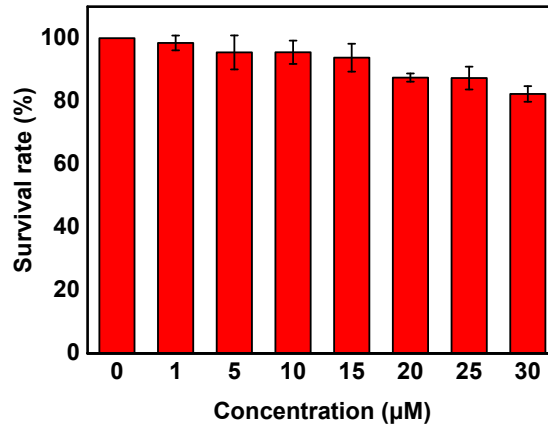

**Figure S9.** Cytotoxicity data of **HZAU800** (0, 1, 5, 10, 15, 20, 25, 30 μM) in HeLa cells.

#### 5. NIR imaging of *S. aureus* and *E. colic* using HZAU800

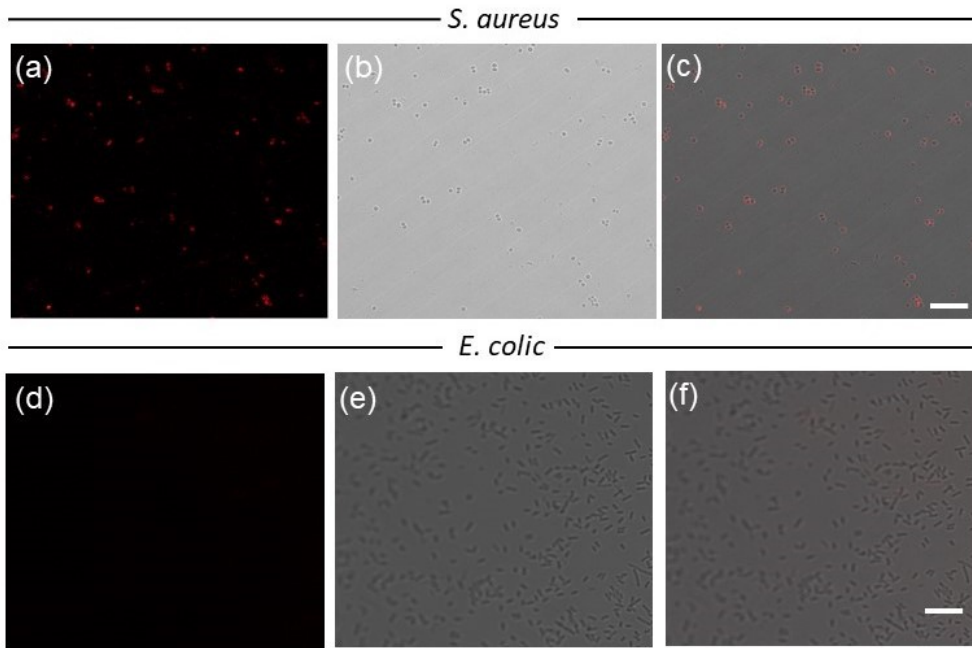

**Figure S10.** NIR imaging of HZAU800 (40  $\mu\text{g}/\text{mL}$ ) in *S. aureus* and *E. colic* with dark field (a) and (d), bright field (b) and (e), merged field (c) and (f), scale bar: 10  $\mu\text{m}$ .

## 6. Evaluation of phototherapeutic effects of HZAU800 on *S. aureus* infected tissues

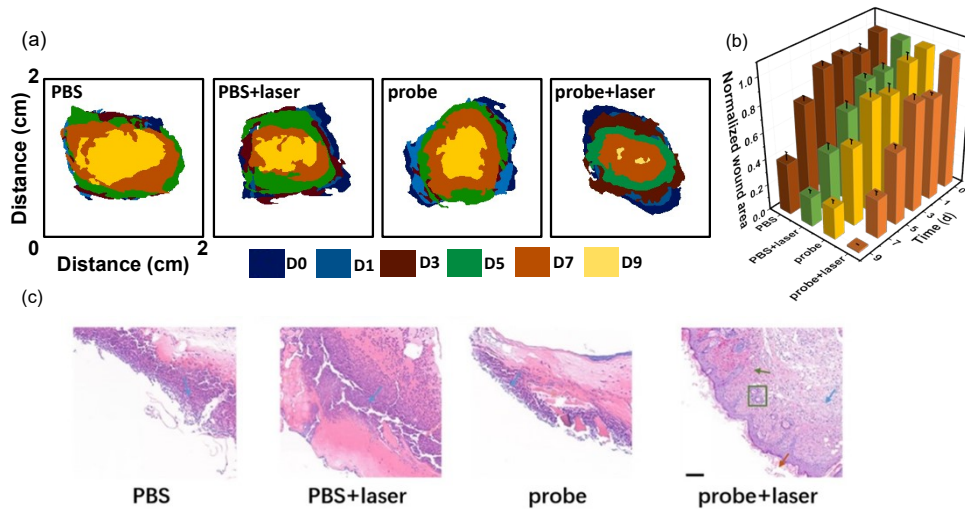

**Figure S11.** (a) and (b) the distance and area of *S. aureus*-infected wounds after different treatments; (c) The hematoxylin and eosin (H&E) staining assessment of *S. aureus*-infected tissues after different treatments, blue arrow: neutrophils, green arrow: fibroblast; green rectangle: granulation tissue. Scale bar: 100  $\mu\text{m}$ .

## 7. The H&E staining assessment of HZAU 800 in different tissues

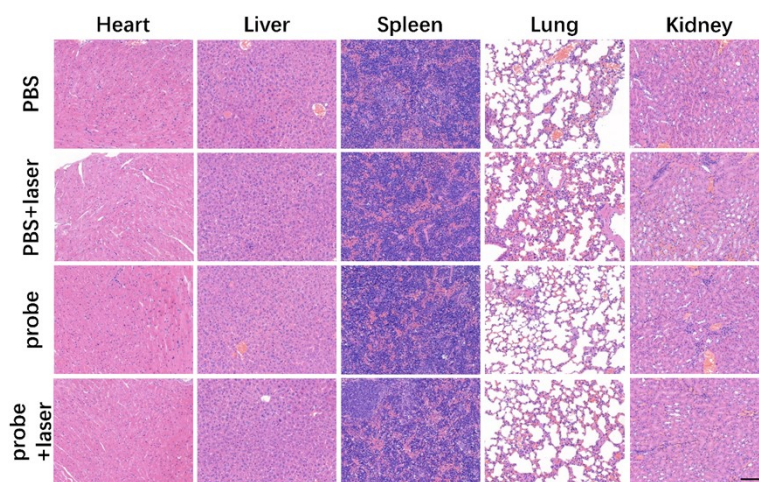

**Figure S12.** The H&E staining assessment of HZAU800 in different tissues. Scale bar: 100  $\mu\text{m}$ .

### 8. The dihedral angle and molecular dynamics simulation of HZAU800

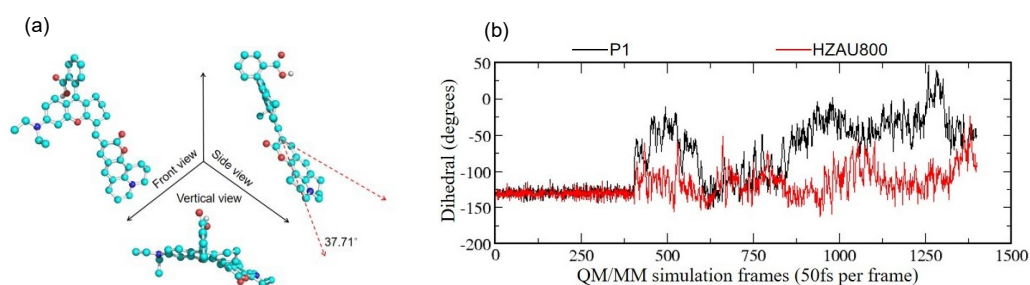

**Figure S13.** (a) the dihedral angle of HZAU800; (b) the molecular dynamics simulation of HZAU800 and P1.

### 9. Reference

- (1) L. Yuan, W. Lin, Y. Yang and H. Chen, A unique class of near-infrared functional fluorescent dyes with carboxylic-acid-modulated fluorescence ON/OFF switching: rational design, synthesis, optical properties, theoretical calculations, and applications for fluorescence imaging in living animals. *J. Am. Chem. Soc.*, 2012, **134**, 1200-1211.
- (2) J. Li, Y. Cui, C. Bi, S. Feng, F. Yu, E. Yuan, S. Xu, Z. Hu, Q. Sun, D. Wei and J. Yoon, Oligo (ethylene glycol)-functionalized ratiometric fluorescent probe for the detection of hydrazine in vitro and in vivo. *Anal. Chem.* 2019, **91**, 7360-7365.
- (3) Y. Liang, Y. Zhao, C. Lai, X. Zou and W. Lin, Coumarin-based TICT fluorescent probe for real-time fluorescence lifetime imaging of mitochondrial viscosity and systemic inflammation in vivo. *J. Mater. Chem. B*, 2021, **9**, 8067-8073.
